# Supplementary material for: Solution-deposited pure selenide CIGSe solar cells from elemental Cu, In, Ga, and Se
Source: Royal Society of Chemistry journal article supplement (doi:10.1039/c5ta05300e), 2015-01-01
Supplement: c5ta05300e1.pdf [file c5ta05300e1.pdf]

## Electronic Supplementary Information

### **Solution-Deposited Pure Selenide CIGSe Solar Cells from Elemental Cu, In, Ga, and Se†**

Dandan Zhao,<sup>a, b</sup> Qingwen Tian,<sup>a, b</sup> Zhengji Zhou,<sup>\*a, b</sup> Gang Wang,<sup>c</sup> Yuena Meng,<sup>a, b</sup> Dongxing Kou,<sup>a, b</sup> Wenhui Zhou,<sup>a, b</sup> Daocheng Pan,<sup>\*c</sup> and Sixin Wu<sup>\*a, b</sup>

<sup>a</sup>The Key Laboratory for Special Functional Materials of MOE, Henan University, Kaifeng, 475004, China. E-mail: zzj@henu.edu.cn. and wusixin@henu.edu.cn.

<sup>b</sup>Collaborative Innovation Center of Nano Functional Materials and Applications, Henan University, Kaifeng 475004, Henan Province, China

<sup>c</sup>State Key Laboratory of Rare Earth Resource Utilization, Changchun Institute of Applied Chemistry, Chinese Academy of Sciences, 5625 Renmin Street, Changchun, Jilin, 130022, China. E-mail: pan@ciac.ac.cn.

**Table S1.** Data of hydrazine and 1,2-ethylenediamine.

| Solvent             | Boiling point<br>(°C) | Melting point<br>(°C) | Vapor pressure<br>(kPa) | Surface tension<br>(mN/m) |
|---------------------|-----------------------|-----------------------|-------------------------|---------------------------|
| Hydrazine           | 113.5                 | 1.4                   | 1.92                    | 66.67                     |
| 1,2-ethylenediamine | 117.26                | 11.3                  | 1.43                    | 40.77                     |

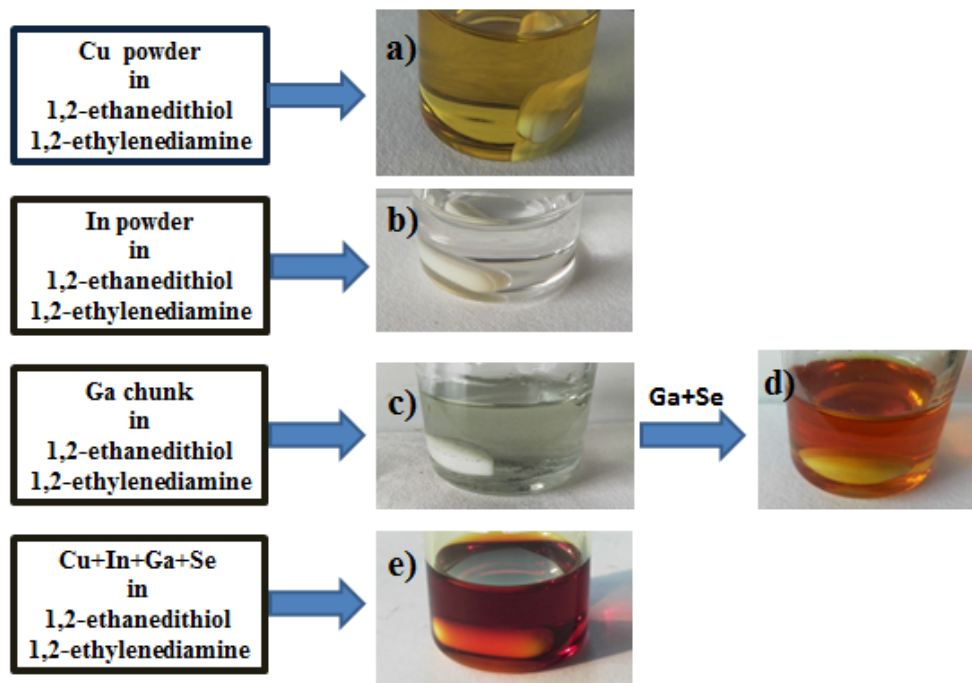

**Fig. S1** Photographs of (a) elemental Cu solution; (b) elemental In solution; (c) elemental Ga solution; (d) elemental Ga and Se solution; (e) elemental Cu, In, Ga and Se solution.

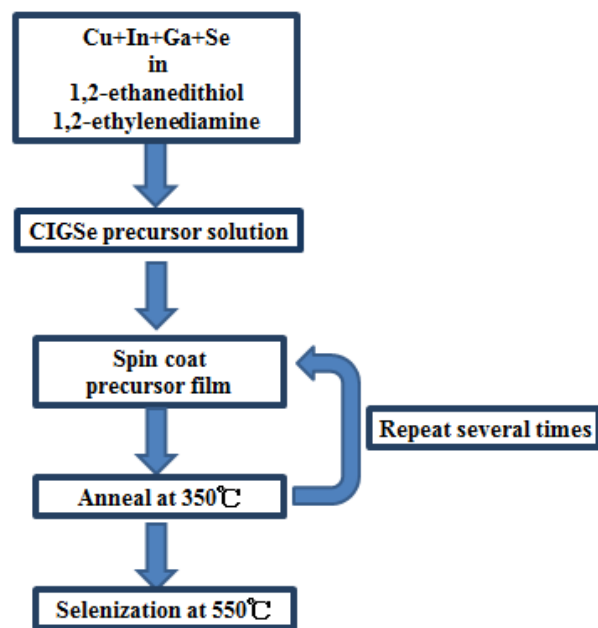

**Fig. S2** Schematic diagram of the solution preparation and film deposition process of the CIGSe absorber layers.

**Table S2.** Chemical composition of the as-prepared and selenized CIGSe thin film.

|                  | Cu    | In    | Ga  | Se   |
|------------------|-------|-------|-----|------|
| As-prepared film | 13.9  | 12.6  | 5.2 | 25.2 |
| Selenized film   | 14.98 | 13.87 | 5.6 | 52.4 |

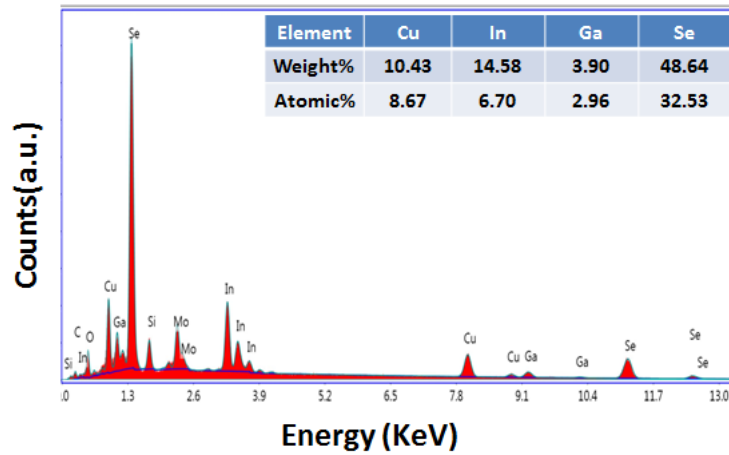**Fig. S3** EDS spectra of the fine-grained bottom layer.**Table S3.** Detail photovoltaic parameters for 9 solar cell devices.

|                | PCE<br>(%)  | V <sub>oc</sub><br>(mV) | J <sub>sc</sub><br>(mA/cm <sup>2</sup> ) | FF<br>(%)    |
|----------------|-------------|-------------------------|------------------------------------------|--------------|
| 1              | 9.50        | 528                     | 26.64                                    | 67.48        |
| 2              | 9.00        | 531                     | 25.01                                    | 67.94        |
| 3              | 8.70        | 524                     | 24.58                                    | 67.72        |
| 4              | 8.67        | 524                     | 24.69                                    | 66.96        |
| 5              | 8.66        | 521                     | 24.60                                    | 67.55        |
| 6              | 8.40        | 521                     | 25.07                                    | 64.55        |
| 8              | 8.30        | 523                     | 25.10                                    | 63.74        |
| 9              | 7.94        | 520                     | 24.77                                    | 61.63        |
| <b>average</b> | <b>8.65</b> | <b>524</b>              | <b>25.06</b>                             | <b>65.95</b> |

## Experimental Section

**Formation of CIGSe Precursor Solution:** First, Cu (0.0699 g, 1.10 mmol), In (0.0960 g, 0.83 mmol), Ga (0.0250 g, 0.35 mmol), Se (0.18125 g, 2.29 mmol), 5 mL of 1,2-ethylenediamine and 0.5 mL of 1,2-ethanedithiol were mixed added into a argon filled round bottom flask. Then the solution was stirred at 60 °C for several hours until all substance dissolved. The solution stays stable for weeks in a closed environment.

**Fabrication CIGSe thin film and CIGSe device:** First, 600 nm Mo forming the back contact of the device sputtered on a (20×20×1.0 mm<sup>3</sup>) soda-lime glass. Then the prepared CIGSe precursor was spin-coated at 3000 rpm for 30 s onto the molybdenum-coated glass. The film was then immediately dried at 350 °C on a preheated hot plate for 1 min. Then repeated the spin-coating/sintering step for several times until the thickness of the film reached 1~2 μm. The CIGSe absorber film was deposited in an argon-filled glove-box with water and oxygen levels maintained below 1 ppm. Next, the as-deposited CIGSe thin film was selenized in a graphite box containing 0.3 g of Se at 550 °C for 20 min in the tubular furnace. And next 70 nm CdS layer was deposited using a chemical bath approach for 12 min. Followed about 50 nm ZnO and 280 nm ITO were sputtered onto the glass/Mo/CIGSe/CdS device. Finally, on the top of the device about 1~2 μm Al grid electrode was made though thermal evaporation. At last the conventional glass/Mo/CIGSe/CdS/ZnO/ITO/Al device was completed. The CIGSe device was made without antireflection layer. Each device, with an active area of 0.19 cm<sup>2</sup>, was separated from neighboring devices by mechanical scribing.

**Characterization:** Thermogravimetric analysis (TGA) scans were performed using the TG/DTA 6200 thermogravimetric analyzer, SII, Inc, in the nitrogen atmosphere up to 800 °C. X-ray data were collected using a Philips X' PertPro with Cu K $\alpha$  radiation. And SEM of the samples' were taken by using field emission scanning electron microscope of JSM-5600LV at 20 KV. The composition of film was characterized by scanning electronic microscope (SEM) equipped with an Energy Dispersive X-Ray Spectroscopy (EDX, Nano SEM 45050/EDX). J-V curve was measurement using a Keithley 2400 source meter under the standard AM1.5 illumination (100 mW·cm<sup>-2</sup>). The external quantum efficiency (EQE) spectrum was measured by a Zolix SCS100QE system.
